# Supplementary material
Source: Springer Nature journal article supplement (https://www.springerprofessional.de/resource/supplementary/13677_2012_29_MOESM1_ESM.pdf/10743508)

Is  $K_b$  the public key of Bob?  
Why I should believe it?

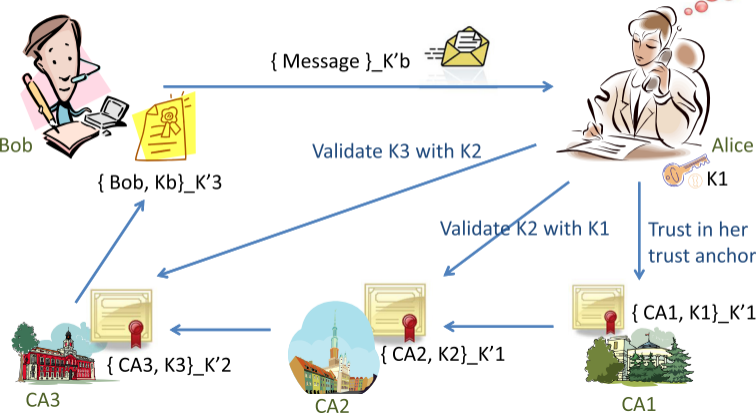

Supplement: MOESM1 [file 10743508]
